# Supplementary material
Source: Springer Nature journal article supplement (https://www.springermedizin.de/resource/supplementary/13063_2011_683_MOESM3_ESM.pdf/9618482)

PPI

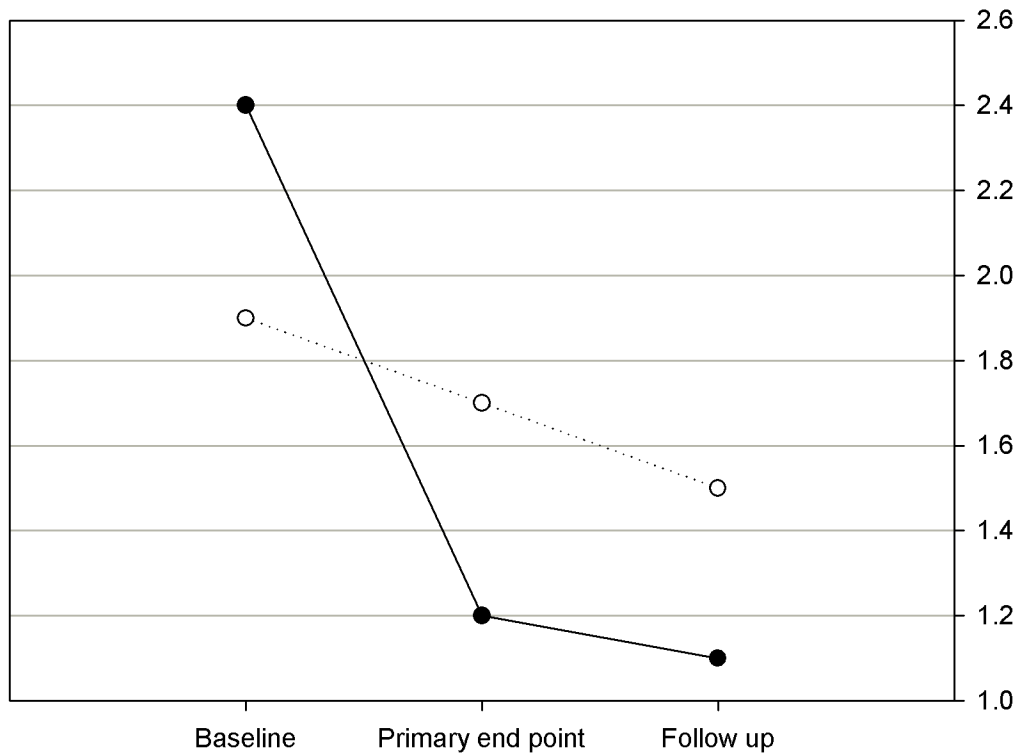

—●— Wet-cupping

···○··· Waiting-list

Supplement: MOESM3 [file 9618482]
